# Supplementary material for: Similar Gut Bacterial Microbiota in Two Fruit-Feeding Moth Pests Collected from Different Host Species and Locations
Source: MDPI journal article supplement (doi:10.3390/insects11120840), 2020-11-28
Supplement: s1 [file s1]

**Table S1** Basic statistics on 16S rRNA gene sequencing of the gut bacterial microbiota for the peach fruit moth (PFM) *Carposina sasakii* and the oriental fruit moth (OFM) *Grapholita molesta* using Illumina Miseq platform. \* primers used for sequencings.

| Item                                                                                 | Data                  |
|--------------------------------------------------------------------------------------|-----------------------|
|                                                                                      | 338F-806R*            |
|                                                                                      | 5'-                   |
|                                                                                      | ACTCCTACGGGAGGCAGCAG- |
|                                                                                      | 3'                    |
| Amplified region                                                                     | 5'-                   |
| Primer sequence 338F                                                                 | GGACTACHVGGGTWTCTAAT- |
| Primer sequence 806R                                                                 | 3'                    |
| Samples number                                                                       | 44                    |
| Passed QC (bp)                                                                       | 905462037             |
| Average length (bp)                                                                  | 418.2527697           |
| Total raw reads                                                                      | 2164868               |
| Average reads                                                                        | 49201                 |
| Minimum read count                                                                   | 33359                 |
| Maximum read count                                                                   | 71332                 |
| Total chloroplast read                                                               | 206585                |
| Total mitochondrial read                                                             | 14499                 |
| Total <i>Wolbachia</i> read                                                          | 549604                |
| Average reads (chloroplast & mitochondrial & <i>Wolbachia</i> sequence removed)      | 17516                 |
| Minimum read count (chloroplast & mitochondrial & <i>Wolbachia</i> sequence removed) | 712                   |
| Maximum read count (chloroplast & mitochondrial & <i>Wolbachia</i> sequence removed) | 66707                 |
| Effective sequence count per sample (after filtering)                                | 385                   |
| Delete the total number of reads                                                     | 2147928               |

**Table S2** Statistics on number of OTUs and their classification identified after filtering for the peach fruit moth (PFM) *Carposina sasakii* and the oriental fruit moth (OFM) *Grapholita molesta*.

| Group | Sample | Phylum | Class | Order | Family | Genus | Species | OTU |
|-------|--------|--------|-------|-------|--------|-------|---------|-----|
| ALL   | 44     | 12     | 21    | 43    | 83     | 158   | 208     | 239 |
| PFM   | 19     | 5      | 11    | 25    | 40     | 61    | 78      | 87  |
| OFM   | 25     | 9      | 19    | 42    | 77     | 131   | 174     | 199 |

**Table S3** Alpha diversity of the gut bacterial microbiota for the peach fruit moth (PFM) *Carposina sasakii* and the oriental fruit moth (OFM) *Grapholita molesta*. Samples were numbered based on their population codes. See Table 1 for population codes.

| Species | Sample | Sobs | Shannon | Simpson | Ace      | Chao     | Coverage |
|---------|--------|------|---------|---------|----------|----------|----------|
| PFM     | CDAE04 | 14   | 0.8042  | 0.5999  | 27.3333  | 23.3333  | 0.9792   |
|         | CDAE09 | 72   | 3.5761  | 0.0422  | 101.7201 | 91.5000  | 0.9299   |
|         | CDAE12 | 10   | 1.0715  | 0.4302  | 21.6389  | 15.0000  | 0.9870   |
|         | CDAE13 | 12   | 1.2048  | 0.3780  | 128.3436 | 22.5000  | 0.9818   |
|         | CDAE24 | 14   | 1.2353  | 0.4190  | 20.9830  | 17.3333  | 0.9870   |
|         | CGAE01 | 15   | 0.9945  | 0.4643  | 99.6677  | 37.5000  | 0.9740   |
|         | CGAE04 | 16   | 0.9044  | 0.4968  | 58.0000  | 38.0000  | 0.9688   |
|         | CGAE08 | 37   | 1.2538  | 0.6123  | 55.4515  | 54.0000  | 0.9558   |
|         | CGAE09 | 70   | 3.3459  | 0.0744  | 102.1997 | 99.0769  | 0.9273   |
|         | CKPR04 | 17   | 1.8504  | 0.1994  | 42.5192  | 20.7500  | 0.9844   |
|         | CKPR09 | 23   | 2.2067  | 0.1538  | 52.0397  | 41.0000  | 0.9766   |
|         | CKPR11 | 23   | 1.3267  | 0.4207  | 35.3932  | 32.0000  | 0.9740   |
|         | CKPR12 | 13   | 1.0590  | 0.5491  | 16.5739  | 16.0000  | 0.9896   |
|         | CKPR20 | 12   | 1.4081  | 0.3183  | 29.2656  | 22.0000  | 0.9870   |
|         | CLPR03 | 39   | 2.0336  | 0.2745  | 117.3853 | 60.1111  | 0.9481   |
|         | CLPR05 | 65   | 3.2354  | 0.0829  | 74.7984  | 72.0588  | 0.9584   |
|         | CLPR12 | 76   | 3.5022  | 0.0541  | 112.8846 | 117.3333 | 0.9169   |
|         | CLPR13 | 88   | 3.7448  | 0.0400  | 136.1734 | 134.8667 | 0.9013   |
|         | CLPR14 | 68   | 2.8322  | 0.1399  | 190.0777 | 123.5000 | 0.9039   |
|         | GGAE01 | 20   | 2.0203  | 0.1648  | 64.9119  | 29.0000  | 0.9766   |
| OFM     | GGAE02 | 15   | 1.0927  | 0.4477  | 63.2108  | 33.0000  | 0.9766   |
|         | GGAE03 | 36   | 2.1105  | 0.2211  | 78.5352  | 58.6667  | 0.9558   |
|         | GGAE06 | 14   | 0.9943  | 0.4742  | 53.0358  | 28.0000  | 0.9792   |

---

|        |    |        |        |          |         |        |
|--------|----|--------|--------|----------|---------|--------|
| GGAE09 | 11 | 1.2358 | 0.3804 | 21.4545  | 21.0000 | 0.9870 |
| GGAE11 | 12 | 1.0601 | 0.4485 | 29.7927  | 22.5000 | 0.9818 |
| GKPR11 | 19 | 1.7760 | 0.2400 | 50.5710  | 23.2000 | 0.9818 |
| GKPR12 | 27 | 2.2625 | 0.1650 | 36.1313  | 31.6667 | 0.9792 |
| GKPR13 | 25 | 2.2548 | 0.1408 | 34.9125  | 34.0000 | 0.9766 |
| GKPR19 | 16 | 1.5763 | 0.3494 | 21.2953  | 26.0000 | 0.9870 |
| GKPR24 | 7  | 0.4886 | 0.7465 | 17.0000  | 10.0000 | 0.9896 |
| GLPR01 | 26 | 1.7019 | 0.2918 | 52.0495  | 39.2000 | 0.9688 |
| GLPR09 | 32 | 2.1643 | 0.1870 | 52.8320  | 45.0000 | 0.9636 |
| GLPR12 | 39 | 1.9638 | 0.3240 | 131.9933 | 91.5000 | 0.9455 |
| GLPR13 | 26 | 1.5542 | 0.3259 | 66.8079  | 56.3333 | 0.9636 |
| GLPR14 | 57 | 2.6901 | 0.1722 | 75.7204  | 70.5714 | 0.9481 |
| GLPR15 | 17 | 1.1179 | 0.4572 | 28.9241  | 24.0000 | 0.9792 |
| GLPR17 | 32 | 1.5102 | 0.3753 | 126.4096 | 84.5000 | 0.9455 |
| GSPH06 | 10 | 0.5320 | 0.7691 | 18.5000  | 15.0000 | 0.9870 |
| GSPH09 | 8  | 0.8914 | 0.5201 | 12.5625  | 9.5000  | 0.9922 |
| GYPH07 | 6  | 0.8359 | 0.5150 | 6.0000   | 6.0000  | 1.0000 |
| GYPH12 | 6  | 0.7292 | 0.5539 | 27.4063  | 9.0000  | 0.9922 |
| GYPH14 | 16 | 1.1227 | 0.4731 | 50.1985  | 30.0000 | 0.9792 |
| GYPH19 | 8  | 0.7389 | 0.5754 | 10.4563  | 9.5000  | 0.9922 |
| GYPH28 | 12 | 1.8464 | 0.2214 | 13.7867  | 12.5000 | 0.9948 |

---

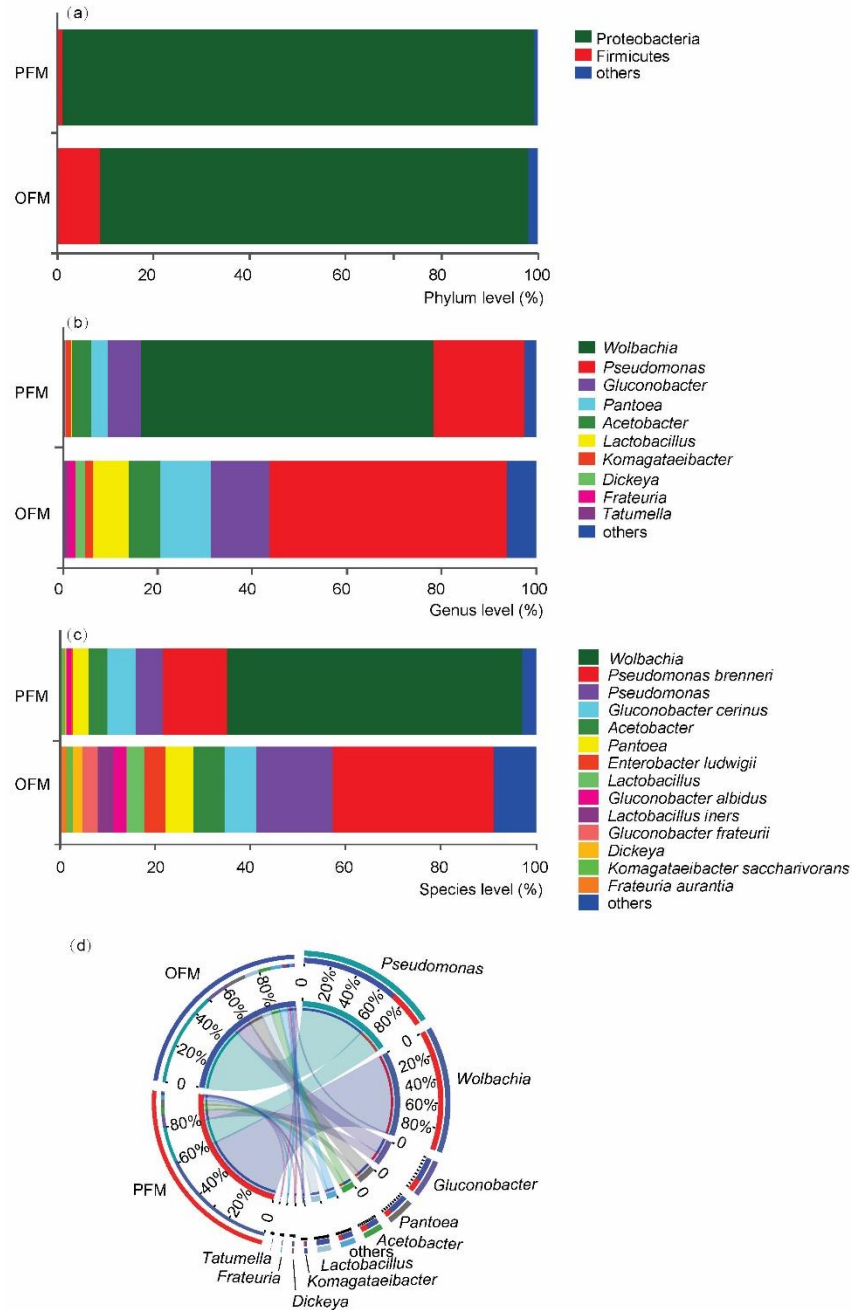

**Figure S1** Microbial composition identified in the peach fruit moth (PFM) *Carpocapsa sasakii* and the oriental fruit moth (OFM) *Grapholita molesta* when *Wolbachia* were kept in analysis. Community composition of the microbiome on phylum (a), genus (b), and species (c) levels for the OFM and PFM. (d) The cooccurrence relation graph describes the abundance of correspondence between samples and species. Each unit was represented by one color. At the genus level, OTUs of PFM were mainly annotated to *Wolbachia* (62.06%), *Pseudomonas* (19.09%), *Gluconobacter* (6.98%), *Acetobacter* (4.05%), and *Pantoea* (3.59%), while OTUs of OFM were mainly annotated to *Pseudomonas* (49.96%), *Gluconobacter* (12.53%), *Pantoea* (10.70%), *Lactobacillus* (7.65%), *Acetobacter* (6.61%).

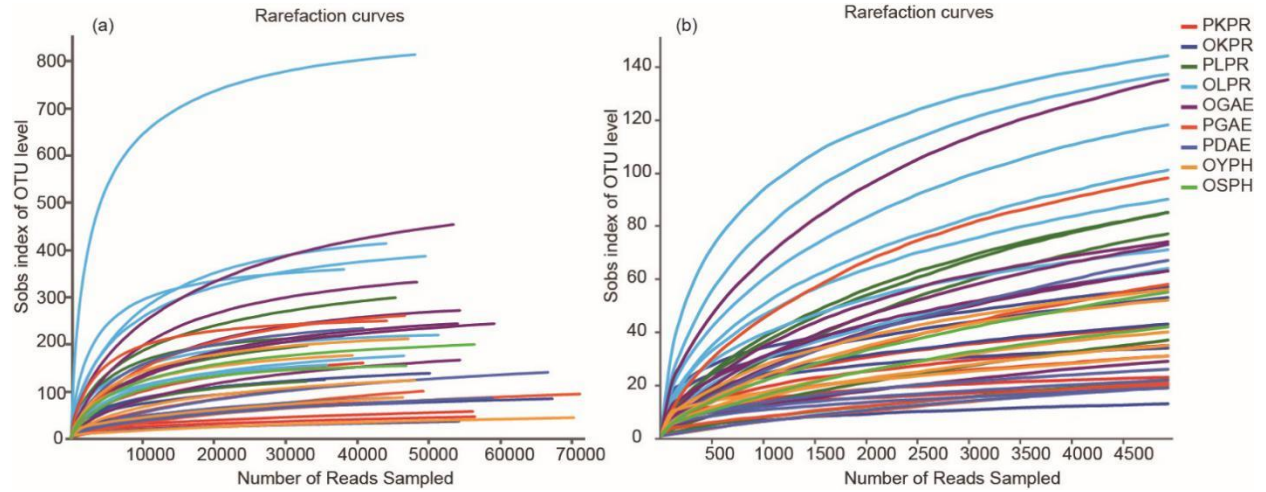

**Figure S2** Rarefaction curves depicted from original sequencing data sets and randomly subsampled data sets with the same number of 16S rRNA sequences determined from the peach fruit moth (PFM), *Carposina sasakii*, and the oriental fruit moth (OFM) *Grapholita molesta*. (a) Rarefaction curves of original sequencing samples. (b) Rarefaction curves of subsampled sequences. The subsampled data were sampled based on the sample with the lowest sequencing depth. OTUs with a total sequence number greater than or equal to 20 and OTUs present in at least 3 samples with a sequence number greater than or equal to 5 were used for subsampling. Both the raw data and the subsampled data start to plateau at about 5000 reads. See Table 1 for population code.
